# Supplementary material
Source: PubMed Central journal article supplement (PMC3911563)
Supplement: JVI.02704-13_zjv999098662so1.pdf [file JVI.02704-13_zjv999098662so1.pdf]

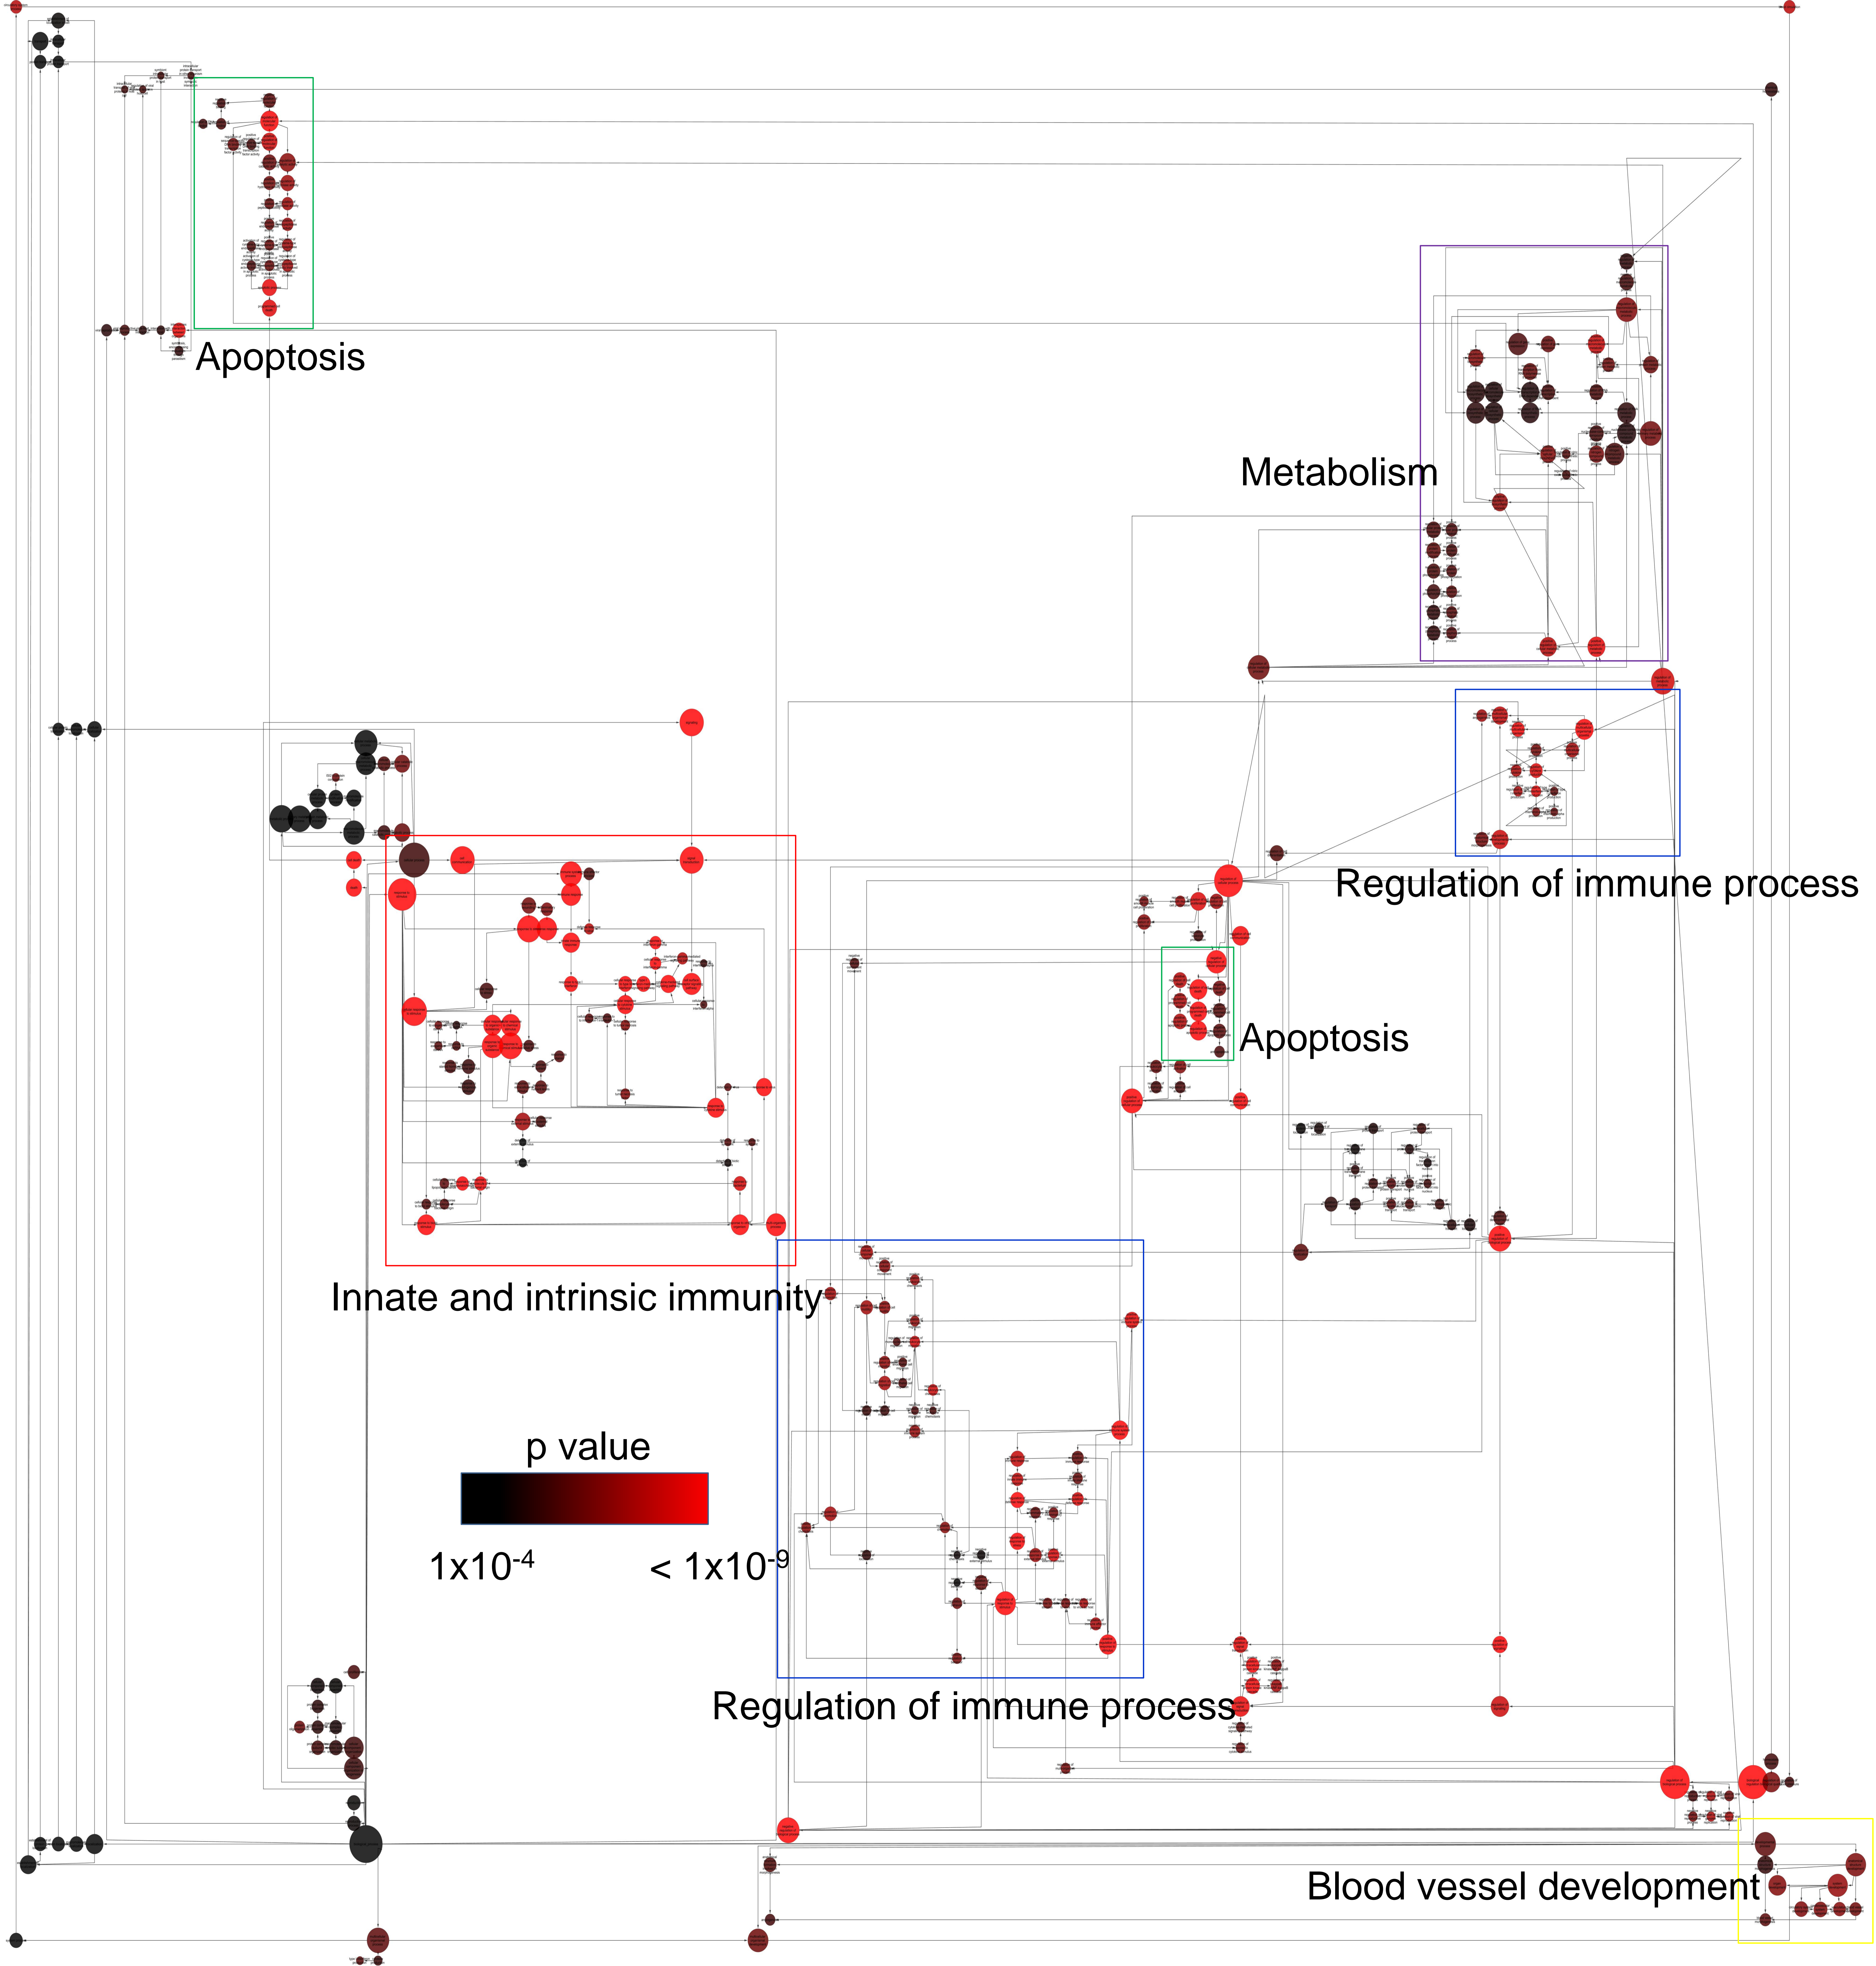

Supplementary figure 1. **Gene ontology Cytoscape maps.** Transcripts identified as differentially regulated by SAM between  $\Delta$ US17 and AD169 at 12 hpi were categorized into gene ontology biological process categories using Cytoscape with the BiNGO plugin. Network maps were generated for all categories where  $p < 0.0001$ . Maps were clustered using the orthogonal layout option within cytoscape to group closely related gene ontology categories together. Colored boxes depict major biological themes that were quantified in Fig. 4.
